# Supplementary material for: “One-pot” click access to triazole bridged cyclodextrin chiral phases for differentiation of clopidogrel enantiomers
Source: Royal Society of Chemistry journal article supplement (doi:10.1039/c5ay01365h), 2015-01-01
Supplement: c5ay01365h1.pdf [file c5ay01365h1.pdf]

## **“One-pot” click access to triazole bridged cyclodextrin chiral phases for differentiation of clopidogrel enantiomers**

Qing Kang, Xiaobin Yao, Lifang Zhang, Zhihua Wu and Yong Wang\*

Department of Chemistry, School of Sciences, Tianjin University, Tianjin 300072, China.  
Collaborative Innovation Center of Chemical Science and Engineering (Tianjin), Tianjin 300072, China

### **Synthesis and characterization of *N*-3-(triethoxysilyl)propyl-2-propynamide**

To a solution of 3-aminopropyltriethoxysilane (APTES) (1.2 g, 5.4 mmol) and propiolic acid (0.44 g, 5.96 mmol) in dry CH<sub>2</sub>Cl<sub>2</sub> (10 mL) was added *N,N'*-dicyclohexylcarbodiimide (DCC) (1.22 g, 5.95 mmol). The reaction mixture was kept at 0 °C for 10 min and then 25 °C for 1 hr. The reaction mixture was filtered and the filtration was concentrated followed by coevaporation with toluene (twice) affording *N*-3-(triethoxysilyl)propyl-2-propynamide as a light yellow syrup.

<sup>1</sup>H NMR (400 MHz, CDCl<sub>3</sub>): δ=7.29 (1H, NH), 3.78 (6H, CH<sub>2</sub>O), 3.21 (2H, CH<sub>2</sub>NH), 2.90 (1H, C≡CH), 1.59 (2H, CH<sub>2</sub>CH<sub>2</sub>NH), 1.18 (9H, OCH<sub>2</sub>CH<sub>3</sub>), 0.62 (2H, CH<sub>2</sub>Si); <sup>13</sup>C NMR (75 MHz, CDCl<sub>3</sub>): δ=161.2, 76.9, 72.8, 58.0, 41.5, 21.8, 17.4, 7.2. FT-IR shows a strong absorption around 2120 cm<sup>-1</sup> (C≡CH).

Table S1 Optimal enantioseparation of flavanone, bendroflumethiazide, dansyl-DL-Leucine and Tröger's base on **CSP1-5**.

| Analytes                                                                                                 | $\alpha$ | $R_s$ | CSP  | Conditions                     |
|----------------------------------------------------------------------------------------------------------|----------|-------|------|--------------------------------|
| Flavanone<br>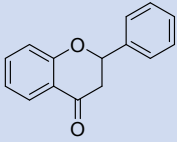           | 1.36     | 2.76  | CSP1 | ACN/H <sub>2</sub> O 30/70     |
|                                                                                                          | 1.19     | 1.96  | CSP2 | MeOH/H <sub>2</sub> O<br>30/70 |
|                                                                                                          | 1.79     | 4.23  | CSP3 | MeOH/H <sub>2</sub> O<br>40/60 |
|                                                                                                          | 1.13     | 1.25  | CSP4 | ACN/H <sub>2</sub> O 30/70     |
|                                                                                                          | 1.37     | 4.41  | CSP5 | ACN/H <sub>2</sub> O 30/70     |
| Bendroflumethiazide<br> | 1.01     | <0.3  | CSP1 | MeOH/H <sub>2</sub> O<br>20/80 |
|                                                                                                          | 1.00     | -     | CSP2 | MeOH/H <sub>2</sub> O<br>20/80 |
|                                                                                                          | 1.67     | 3.55  | CSP3 | MeOH/H <sub>2</sub> O<br>30/70 |
|                                                                                                          | 1.00     | -     | CSP4 | MeOH/H <sub>2</sub> O<br>20/80 |
|                                                                                                          | 1.01     | 0.7   | CSP5 | MeOH/H <sub>2</sub> O<br>20/80 |
| Dansyl-DL-leucine<br> | 1.98     | 5.03  | CSP1 | MeOH/Buffer<br>50/50           |
|                                                                                                          | 1.00     | -     | CSP2 | MeOH/Buffer<br>50/50           |
|                                                                                                          | 1.00     | -     | CSP3 | MeOH/Buffer<br>50/50           |
|                                                                                                          | 1.23     | 1.54  | CSP4 | MeOH/Buffer<br>50/50           |
|                                                                                                          | 2.02     | 7.69  | CSP5 | MeOH/Buffer<br>50/50           |
| Tröger's base<br>     | 1.10     | 1.51  | CSP1 | MeOH/H <sub>2</sub> O<br>35/65 |
|                                                                                                          | 1.00     | -     | CSP2 | MeOH/H <sub>2</sub> O<br>35/65 |
|                                                                                                          | 1.00     | -     | CSP3 | MeOH/H <sub>2</sub> O<br>35/65 |
|                                                                                                          | 1.19     | 1.69  | CSP4 | MeOH/H <sub>2</sub> O<br>35/65 |
|                                                                                                          | 1.12     | 1.88  | CSP5 | MeOH/H <sub>2</sub> O<br>35/65 |

Buffer: 1% Triethylammonium acetate (pH=4.1); flow rate: 0.8 mL·min<sup>-1</sup>.

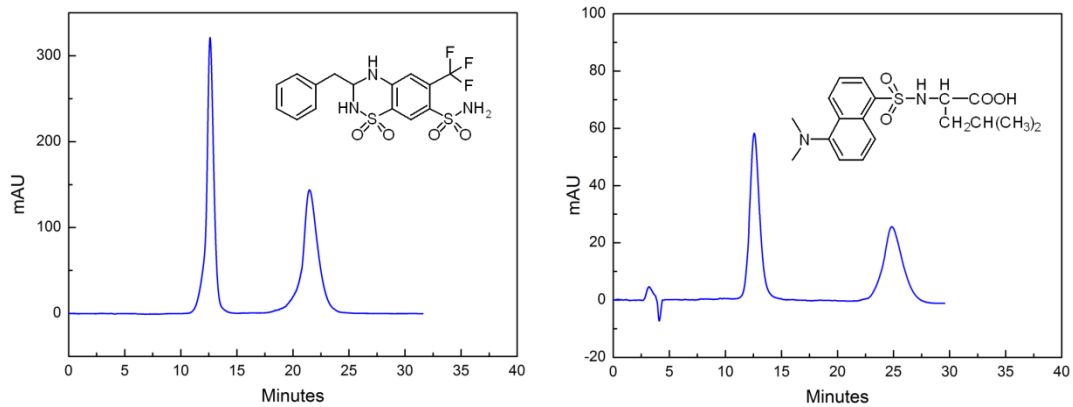

Fig.S1 Typical chromatograms on the prepared CDCSPs. Left: CSP3, MeOH/H<sub>2</sub>O 30/70; Right: CSP5, MeOH/Buffer 50/50; Other conditions: see Table S1.
